32 **Abstract**

33            Selective attention is necessary to sift through, form a coherent percept of, and make behavioral  
34            decisions on the vast amount of information present in most sensory environments. How and where  
35            selective attention is employed in cortex and how this perceptual information then informs the  
36            relevant behavioral decisions is still not well understood. Studies probing selective attention and  
37            decision making in visual cortex have been enlightening as to how sensory attention might work in  
38            that modality; whether or not similar mechanisms are employed in auditory attention is not yet  
39            clear. Therefore, we trained rhesus macaques on a feature selective attention task, where they  
40            switched between reporting changes in temporal (amplitude modulation, AM) and spectral (carrier  
41            bandwidth) features of a broadband noise stimulus. We investigated how the encoding of these  
42            features by single neurons in primary (A1) and secondary (lateral belt, ML) auditory cortex were  
43            affected by the different attention conditions. We found that neurons in A1 and ML showed mixed-  
44            selectivity to the sound and task features. We found no difference in AM encoding between the  
45            attention conditions. We found that choice-related activity in both A1 and ML neurons shifts  
46            between attentional conditions. This finding suggests that choice-related activity in auditory cortex  
47            does not simply reflect motor preparation or action, and supports the relationship between  
48            reported choice-related activity and the decision and perceptual process.

49

50

51

52 **New & Noteworthy**

53 We recorded from primary and secondary auditory cortex while monkeys performed a non-spatial  
54 feature attention task. Both areas exhibited rate-based choice-related activity. The manifestation of  
55 choice-related activity was attention-dependent, suggesting that choice-related activity in auditory  
56 cortex does not simply reflect arousal or motor influences, but relates to the specific perceptual choice.  
57 The lack of temporal-based choice activity is consistent with growing evidence that subcortical, but not  
58 cortical, single neurons inform decisions through temporal envelope following.

## 59 Introduction

60 The auditory system is often faced with the difficult challenge of encoding a specific sound in a  
61 noisy environment, such as following a conversation in a loud room. The neural mechanisms by which  
62 the auditory system attends to one sound source and ignores distracting sounds are not yet understood.  
63 Studies probing the mechanisms underlying auditory attention in cortex have been largely concerned  
64 with task engagement, wherein the effects of active performance on neural activity is compared to  
65 those of passive listening. Studies in auditory cortex (AC) utilizing this paradigm have shown that task  
66 engagement can improve behaviorally-relevant neural sound discrimination (Atiani et al. 2014; Bagur et  
67 al. 2018; Buran et al. 2014; Carcea et al. 2017; Francis et al. 2018a; Niwa et al. 2012a, 2015; von Trapp et  
68 al. 2016), modulate neuronal tuning (Fritz et al. 2003, 2007; Fritz 2005; Lee and Middlebrooks 2011; Lin  
69 et al. 2019; Yin et al. 2014), alter the structure of correlated variability within neural populations  
70 (Downer et al. 2015, 2017a), and more (Massoudi et al. 2014; Angeloni and Geffen 2018; Osmani and  
71 Wang 2015; Sutter and Shamma 2011). Though informative, this active/passive paradigm makes it  
72 difficult to disentangle arousal and motor effects from the mechanisms more specifically employed in  
73 selectively attending to a single sound source or feature amidst auditory ‘clutter’.

74 Studies of the neural basis of auditory selective attention at the single neuron level are rare  
75 (Schwartz and David 2018), and non-spatial auditory feature-selective attention has been relatively  
76 unexplored (Downer et al. 2017b). Feature-selective attention, which segregates particular sound  
77 features, such as intensity or fundamental frequency, is essential for tasks such as discriminating  
78 between talkers in a noisy environment (Bregman 1994; McDermott 2009; Bizley and Cohen 2013;  
79 Shinn-Cunningham 2008; Woods and McDermott 2015). Furthermore, it can prove useful for listeners to  
80 switch between attended sound features because the most distinctive feature dimensions may vary  
81 across sources (Woods and McDermott 2015; Bregman 1994).

82           In visual cortex, feature-based attention has been suggested to follow a gain model similar to  
83   spatial attention, where responsivity to the attended feature increases in cells tuned to the attended  
84   feature and decreases in cells tuned to orthogonal features (Martinez-Trujillo and Treue 2004; Maunsell  
85   and Treue 2006). Studies of spatial attention in AC single neurons suggest that AC employs a mechanism  
86   similar to that reported in visual cortex, where a gain in neural activity increases when attention is  
87   directed into the receptive field of a neuron and, conversely, gain decreases when attention is directed  
88   outside the receptive field (Engle and Recanzone 2013; Lee and Middlebrooks 2011; Scott et al. 2007) .  
89   We endeavored to see if feature-selective attention in AC is also facilitated by a gain in activity in  
90   neurons tuned to an attended feature.

91           How and where task relevant sensory information is transformed into a decision in the brain is  
92   still largely unclear. There have been mixed reports of activity correlated to the reported decision in AC  
93   (Christison-Lagay et al. 2017; Elgueda et al. 2019; Guo et al. 2019; Niwa et al. 2012b; Runyan et al. 2017;  
94   Tsunada et al. 2016; Tsunada and Cohen 2014). This choice-related activity has been reported in some  
95   studies as early as primary auditory cortex (A1) (Atiani et al. 2014; Bathellier et al. 2012; Bizley et al.  
96   2013; Christison-Lagay et al. 2017; Christison-Lagay and Cohen 2018; Francis et al. 2018b, 2018b;  
97   Gronskaya and von der Behrens 2019; Huang et al. 2019; Niwa et al. 2012b). As one progresses further  
98   along the auditory cortical hierarchy, there is either an increasingly larger proportion of neurons  
99   showing activity correlated to the decision, or the nature of the choice signal changes (Atiani et al. 2014;  
100   Niwa et al. 2013; Tsunada et al. 2016). Both cases suggest that the sensory evidence informing task-  
101   relevant decisions is transformed as the information moves up the processing stream (Bizley and Cohen  
102   2013; Hackett 2011; Huang and Brosch 2020; Romanski et al. 1999).

103           There has also been uncertainty as to whether the reported choice activity in AC could be more  
104   reflective of motor influences than perceptual or decision-related influences. Go/No-Go tasks are  
105   typically used in auditory cortical studies, and these tasks require movement for report of one choice,

106 but not the other (Brosch 2005; Niwa et al. 2013); forced-choice tasks reduce this uncertainty by  
107 requiring movements for either report (Guo et al. 2019). It has been well documented that movement  
108 can modulate auditory cortical activity (Eliades and Wang 2003; Guo et al. 2019; Schneider et al. 2014).  
109 Here, we employ a Yes/No forced-choice task format in which a movement is required for both  
110 responses in order to disentangle motor-related from choice-related activity in AC.

111 We investigated whether a mechanism for feature-selective attention similar to feature-based  
112 attention in visual cortex is employed in primary (A1) and secondary (middle lateral belt, ML) auditory  
113 cortex using noise that was amplitude modulated (AM) or bandwidth restricted ( $\Delta$ BW). Monkeys were  
114 presented sounds that varied either in spectral ( $\Delta$ BW) or temporal (AM) dimensions, or both, and  
115 performed a detection task in which they reported change along one of these feature dimensions. In this  
116 study, we focus on the amplitude modulation feature, as it has been well studied and is a salient  
117 communicative sound feature for humans and other animals (Schnupp 2006; Shannon et al. 1995; Van  
118 Tasell et al. 1987; Wang et al. 2007) and can be helpful in sound source segregation (Bregman 1994;  
119 Grimault et al. 2002). Spectral content changes were used as a difficulty-matched attentional control.  
120 We hypothesized we would see a gain in AM encoding when animals were cued to attend to that  
121 feature, compared to when they were cued to attend  $\Delta$ BW changes. We also examined choice-related  
122 activity in AC, hypothesizing to find a larger proportion of neurons with significant choice-related activity  
123 in higher-order AC (ML) than in A1.

124

## 125 **Materials and Methods**

### 126 *Subjects.*

127 Subjects were two adult rhesus macaques, one male (13kg, 14-16 years old), one female (7kg,  
128 17-19 years old). All procedures were approved by the University of California–Davis Animal Care and

129 Use Committee and met the requirements of the United States Public Health Service policy on  
130 experimental animal care.

131

132 *Stimuli.*

133 Stimuli were constructed from broadband Gaussian (white) noise bursts (400 ms; 5 ms cosine  
134 ramped), 9 octaves in width (40 to 20480 Hz). Four different seeds were used to create the carrier noise,  
135 which was frozen across trials. To introduce variance along spectral and temporal dimensions, the  
136 spectral bandwidth of the noise was narrowed ( $\Delta BW$ ) and/or the noise envelope was sinusoidally  
137 amplitude modulated (AM). The extent of variation in each dimension was manipulated to measure  
138 behavioral and neural responses above and below threshold for detecting each feature.

139 Sound generation methods have been previously reported (O'Connor et al., 2011). Briefly,  
140 sound signals were produced using an in-house MATLAB program and a digital-to-analog converter  
141 (Cambridge Electronic Design [CED] model 1401). Signals were attenuated (TDT Systems PA5, Leader  
142 LAT-45), amplified (RadioShack MPA-200), and presented from a single speaker (RadioShack PA-110)  
143 positioned approximately 1.5 m in front of the subject centered at the interaural midpoint. Sounds were  
144 generated at a 100 kHz sampling rate. Intensity was calibrated across all sounds (Bruel & Kjaer model  
145 2231) to 65 dB at the outer ear. It is important to note that some methods of generating  $\Delta BW$  introduce  
146 variation in that sound's envelope, however we implemented a synthesis method that constructs noise  
147 using a single-frequency additive technique and thus avoids introducing envelope variations that could  
148 serve as cues for  $\Delta BW$  (Strickland and Viemeister 1997).

149

150 *Recording procedures.*

151 Each animal was implanted with a head post centrally behind the brow ridge and a recording  
152 cylinder over an 18 mm craniotomy over the parietal lobe using aseptic surgical techniques (O'Connor et

153 al. 2005). Placement of the craniotomy was based on stereotactic coordinates of auditory cortex to  
154 allow vertical access through parietal cortex to the superior temporal plane (Saleem and Logothetis  
155 2007).

156 All recordings took place in a sound attenuating, foam-lined booth (IAC: 2.9x3.2x2 meters) while  
157 subjects sat in an acoustically transparent chair (Crist Instruments). Three quartz-coated tungsten  
158 microelectrodes (Thomas Recording, 1–2 M $\Omega$ ; 0.35 mm horizontal spacing; variable, independently  
159 manipulated vertical spacing) were advanced vertically to the superior surface of the temporal lobe.  
160 Extracellular signals were amplified (AM Systems model 1800), bandpass filtered between 0.3 Hz and 10  
161 kHz (Krohn-Hite 3382), and then converted to a digital signal at a 50 kHz sampling rate (CED model  
162 1401). During electrode advancement, auditory responsive neurons were isolated by presenting various  
163 sounds while the subject sat passively. When at least one auditory responsive single unit was well  
164 isolated, we measured neural responses to the two features while the subjects sat passively awake. At  
165 least 10 repetitions of each of the following stimuli were presented: the unmodulated noise, each level  
166 of bandwidth restriction, and each of the possible AM test modulation frequencies (described below).  
167 We also measured pure tone and bandpass noise tuning to aid in distinguishing area boundaries.  
168 After completing these tuning measures, experimental behavioral testing and recording began. When  
169 possible, tuning responses to the tested stimuli were again measured after task performance, to ensure  
170 stability of electrodes throughout the recording. Contributions of single units (SUs) to the signal were  
171 determined offline using principal components analysis-based spike sorting tools from Spike2 (CED).  
172 Spiking activity was at least 4–5 times the background noise level. Fewer than 0.1% of spike events  
173 assigned to single unit clusters fell within a 1 ms refractory period window. Only recordings in which  
174 neurons were well isolated for at least 180 trials within each condition were included in analysis here.

175



176 *Cortical field assessment.*

177           Recording locations were determined using both stereotactic coordinates (Martin and Bowden  
178 1996) and established physiological measures (Merzenich and Brugge 1973; Rauschecker and Tian 2000;  
179 Tian and Rauschecker 2004). In each animal, we mapped characteristic frequency (CF) and sharpness of  
180 bandpass noise tuning to establish a topographic distribution of each. Tonotopic gradient reversal, BW  
181 distribution, spike latency and response robustness to pure tones was used to estimate the boundary  
182 between A1 and ML and assign single units to an area (Downer et al. 2017a; Niwa et al. 2015).  
183 Recordings were assigned to their putative cortical fields *post hoc* using recording location, tuning  
184 preferences, and latencies.

185

186 *Feature attention task.*

187           This feature attention task has been previously described in detail (Downer et al. 2017b). The  
188 subjects performed a change detection task in which only changes in the attended feature were relevant  
189 for the task. Subjects moved a joystick laterally to initiate a trial, wherein an initial sound (the S1, always  
190 the 9-octave-wide broadband, unmodulated noise) was presented, followed by a second sound (S2)  
191 after a 400ms inter-stimulus interval (ISI). The S2 could be identical to the S1, it could change by being  
192 amplitude-modulated (AM), it could change by being bandwidth restricted ( $\Delta$ BW), or it could change  
193 along both feature dimensions.

194           Only three values of each feature (AM,  $\Delta$ BW) were presented, limiting the size of the stimulus  
195 set in order to obtain reasonable power for neural data analysis. The stimulus space was further reduced  
196 by presenting only a subset of the possible co-varying stimuli. Within each recording session, we  
197 presented 13 total stimuli. To equilibrate difficulty between the two features, we presented values of  
198 each feature so that one was near threshold, one was slightly above, and one far above threshold.

199 Thresholds were determined for each feature independently for each subject using a range of six levels  
200 for each feature before three feature values for each animal were selected and the co-varying feature  
201 attention task began. For Monkey U, the  $\Delta BW$  values were 0.375, 0.5, and 1 octave and the AM depth  
202 values were 28%, 40%, and 100%. For Monkey W, the  $\Delta BW$  values were 0.5, 0.75, and 1.5 octaves and  
203 the AM depth values were 40%, 60%, and 100%.

204 For all analyses in which data are collapsed across subjects,  $\Delta BW$  values and AM values are  
205 presented as ranks ( $\Delta BW$  0-3 and AM 0-3) (e.g., Fig. 1). Within a given session, AM sounds were  
206 presented at only a single modulation frequency. Across sessions, a small set of frequencies was used  
207 (15, 22, 30, 48, and 60 Hz). The AM frequency was selected randomly each day. Subjects were cued  
208 visually via an LED above the speaker as to which feature to attend (green or red light, counterbalanced  
209 between subjects). Additionally, each block began with 60 “instruction” trials in which the S2s presented  
210 were only altered along the attended feature dimension (i.e., sounds containing the distractor feature  
211 were not presented). Subjects were to respond with a “yes” (up or down joystick movement,  
212 counterbalanced across subjects) on any trial in which the attended feature was presented, otherwise,  
213 the correct response was “no” (opposite joystick movement). We chose upward or downward joystick  
214 movement to avoid influences on single neuron choice activity dependent on contralateral movements.  
215 Such movement related activity has been recently reported in other studies (Guo et al. 2019). Hits and  
216 correct rejections were rewarded with a drop of water or juice and misses and false alarms resulted in a  
217 penalty (3–5 s timeout).

218 During the test conditions, the S2 was unmodulated broadband noise (no change from S1) on  
219 25% of the trials, co-varying on 25% of the trials, and contained only  $\Delta BW$  or AM on 25% of the trials  
220 respectively. Sounds in the set were presented pseudo-randomly such that, over sets of 96 trials, the  
221 entire stimulus set was presented exhaustively (including all four random noise seeds). Block length was  
222 variable, based in part on subjects’ performance, to ensure a sufficient number of correct trials for each

223 stimulus. Not including instruction trials, block length was at least 180 trials and at most 360 trials, to  
224 ensure that subjects performed in each attention condition at least once during the experiment.  
225 Subjects could perform each attention condition multiple times within a session. Only sessions in which  
226 subjects completed at least 180 trials per condition (excluding instruction trials) were considered for  
227 analysis in this study.

228

### 229 *Analysis of single neuron feature selectivity*

230 Neurons' firing rate responses across the range of values were calculated to derive a firing rate  
231 function for each feature. Functions were categorized based on whether firing rates increased as the  
232 level of the feature increased or decreased ('increasing' vs. 'decreasing' functions). Spike counts (SC)  
233 were calculated over the entire 400ms stimulus window. SCs in response to feature-present stimuli were  
234 normalized over the entire spike count distribution across both features, including unmodulated noise,  
235 for that cell. To characterize this response function, we calculated a feature-selectivity index (FSI) for  
236 each feature as follows:

237 [1] 
$$FSI_{AM} = \frac{SC_{AM>0, \Delta BW_0} - SC_{AM_0, \Delta BW_0}}{SC_{AM>0, \Delta BW_0} + SC_{AM_0, \Delta BW_0}}$$

238 [2] 
$$FSI_{BW} = \frac{SC_{\Delta BW>0, AM_0} - SC_{\Delta BW_0, AM_0}}{SC_{\Delta BW>0, AM_0} + SC_{\Delta BW_0, AM_0}}$$

239 Where  $SC_x$  is the mean SC in response to the given set of stimuli designated by the subscript. A Kruskal–  
240 Wallis rank-sum test was performed between distributions of SCs with the feature-present (feature level  
241 greater than 0) and those with the feature-absent (feature value of 0) to determine the significance of  
242 the FSI for each neuron. Cells that had a significant FSI for a given feature were categorized as encoding  
243 that feature.

244

245 *Phase projected vector strength*

246 Vector strength (VS) is a metric that describes the degree to which the neural response is phase-  
247 locked to the stimulus (Goldberg and Brown 1969; Mardia and Jupp 2000). VS is defined as:

248 [3] 
$$VS = \frac{\sqrt{(\sum_{i=1}^n \cos \theta_i)^2 + (\sum_{i=1}^n \sin \theta_i)^2}}{n}$$

249 Where  $n$  is the number of spikes over all trials and  $\theta_i$  is the phase of each spike, in radians, calculated by:

250 [4] 
$$\theta_i = 2\pi \frac{t_i \bmod p}{p}$$

251 Where  $t_i$  is the time of the spike (in ms) relative to the onset of the stimulus and  $p$  is the modulation  
252 period of the stimulus (in ms). When spike count is low, VS has a tendency to report as spuriously high.  
253 Phase projected Vector Strength ( $VS_{pp}$ ), is a variation on VS developed to help mitigate issues with low  
254 SC trials (Yin et al. 2011).  $VS_{pp}$  is calculated by first calculating VS for each trial, then the mean phase  
255 angle of each trial is compared to the mean phase angle of all trials, and the trial VS value is penalized if  
256 out of phase with the global mean response.  $VS_{pp}$  is defined as:

257 [5] 
$$VS_{pp} = VS_t \cos(\phi_t - \phi_c)$$

258 Where  $VS_{pp}$  is the phase-projected vector strength per trial,  $VS_t$  is the vector strength per trial, as  
259 calculated in [1], and  $\phi_t$  and  $\phi_c$  are the trial-by-trial and mean phase angle in radians, respectively,  
260 calculated for each stimulus by:

261 [6] 
$$\phi = \arctan2\left(\frac{\sum_{i=1}^n \sin \theta_i}{\sum_{i=1}^n \cos \theta_i}\right)$$

262 Where  $n$  is the number of spikes per trial (for  $\phi_t$ ) or across all trials (for  $\phi_c$ ). In this report, we use  $VS_{pp}$   
263 exclusively to measure phase-locking, as SC tended to be relatively low and VS and  $VS_{pp}$  tend to be in  
264 good agreement with the exception of low SCs where  $VS_{pp}$  tends to be more accurate than VS (Yin et al.  
265 2011). To determine significance of  $VS_{pp}$  encoding for each neuron, a Kruskal–Wallis rank-sum test was  
266 performed between distributions of  $VS_{pp}$  values on trials with non-zero AM depths, to those from  
267 unmodulated noise trials. Of note, when we refer to the  $VS_{pp}$  in response to an unmodulated stimulus,

268 this is a control measurement assuming the same modulation frequency as the corresponding AM  
269 frequency from that recording session.

270

#### 271 *Analysis of neural discriminability*

272 We applied the signal detection theory-based metric area under the receiver operating  
273 characteristic (ROCa) (Green and Swets 1974) to measure how well neurons could detect each feature.  
274 ROCa represents the probability an ideal observer can detect the presence of the target feature given  
275 only a measure of the neural responses (either firing rate or  $VS_{pp}$ ). To calculate ROCa, we partitioned the  
276 trial-by-trial neural responses into two distributions: those when the target feature was present in the  
277 stimulus and trials where it was absent. Then we determined the proportion of trials in each group  
278 where the neural response exceeds a criterion value. We repeated the measure using 100 criterion  
279 values, covering the whole range of responses. The plot of the probability of exceeding the criterion for  
280 feature-present trials (neural 'hits') versus the probability of exceeding the criteria for feature-absent  
281 trials (neural false alarms) plotted for all 100 criteria as separate points creates the ROC plot. The area  
282 under this curve is the ROCa. ROCa is bounded by 0 and 1, where both extremes indicate perfect  
283 discrimination between target feature-present and -absent stimuli, and 0.5 indicates a chance level of  
284 discrimination between the two distributions.

285

#### 286 *Analysis of choice-related activity*

287 Choice probability (CP) is an application of ROC analysis used to measure the difference  
288 between neural responses contingent on what the animal reports, for example, whether a stimulus  
289 feature is present or absent (Britten et al. 1992, 1996). Similar to ROCa described above, CP values are  
290 bounded by 0 and 1, and a CP value of 0.5 indicates no difference (or perfect overlap) in the neural  
291 responses between 'feature-present' and 'feature-absent' reports. A CP value of 1 means for every trial

292 that the animal reports a feature, the neuron fired more than on trials where the animal did not report  
293 the feature. A CP value of 0 means that, for every trial that the animal reports a feature, the neuron  
294 fired *less* than on trials where the animal did not report the feature. Stimuli that did not have at least 5  
295 ‘yes’ and 5 ‘no’ responses were excluded from analyses. CP was calculated based on both firing rate and  
296 on  $VS_{pp}$ . For rate-based CP, we calculated CP both for each stimulus separately, and pooled across  
297 stimuli. We calculated this stimulus-pooled CP by first separating the ‘yes’ and ‘no’ response trials within  
298 stimulus, then converting these rates into z-scores within a stimulus, then combined these z-scored  
299 responses across stimuli. This type of z-scoring has been found to be conservative in estimating CP (Kang  
300 and Maunsell 2012). CP was calculated during both the 400ms stimulus presentation (S2) and during the  
301 response window (RW), the time after stimulus offset and prior to the response (typically ~0.2 – 3s). The  
302 significance of each neuron’s CP was determined using a permutation test (Britten et al. 1996). The  
303 neural responses were pooled between the ‘feature-present report’ and ‘feature-absent report’  
304 distributions and random samples were taken (without replacement). CP was then calculated from this  
305 randomly sampled set. This procedure was repeated 2000 times. The  $p$  value is the proportion of CP  
306 values from these randomly sampled repeats that were greater than the CP value from the non-shuffled  
307 distributions.

308

## 309 **Results**

310 We recorded activity from 92 single units in A1 (57 from Monkey W, 35 from Monkey U) from 33  
311 recording sessions and 122 single units in ML (49 from Monkey W, 73 from Monkey U) over 39 recording  
312 sessions as animals performed a feature-selective attention task.

313

314 *Feature tuning*

315           There was no significant difference in the proportions of neurons in A1 and ML that encoded  
316 AM (47.8% A1, 38.5% ML;  $p = 0.08$ ,  $\chi^2$  test). We found a large proportion of neurons in both A1 and ML  
317 that were sensitive to the relatively small changes in  $\Delta BW$  from the 9-octave wide unmodulated noise,  
318 though there was no difference in the proportion of  $\Delta BW$  encoding neurons between areas (32.6% A1,  
319 29.5% ML;  $p = 0.18$ ,  $\chi^2$  test ) (Table 1).

320           A large population of neurons decreased firing rate for increasing AM depth ('decreasing cells')  
321 in both A1 and ML (Table 1). We also found that nearly half of the neurons in both A1 and ML  
322 decreased firing rate for increasing  $\Delta BW$  (Table 1). However, the population of neurons that *significantly*  
323 encoded AM was largely dominated by cells that increased firing rate for increasing AM depth in both A1  
324 and ML, with only 13.6% of AM encoders classified as 'decreasing' units in A1, and 10.6% of AM  
325 encoders 'decreasing' in ML. Among significant  $\Delta BW$  encoders, the population was more evenly split  
326 between 'increasing' and 'decreasing' units in both A1 and ML: 43.3% of  $\Delta BW$  encoders have  
327 'decreasing' functions in A1 vs. 30.6% in ML. In both A1 and ML, there was a significant positive  
328 correlation between AM and BW selectivity, so cells that tended to increase firing rate for increasing AM  
329 levels, also tended to increase firing rate for increasing  $\Delta BW$  levels (For  $FSI_{AM}$  vs.  $FSI_{BW}$ , A1 Pearson's rho  
330 = 0.3143,  $p = 0.002$ ; ML Pearson's rho = 0.3109,  $p = 5.3 \text{ e-}4$ ) (Figure 1). In this feature selective attention  
331 task, we found no significant difference between A1 and ML in the proportions of 'increasing' and  
332 'decreasing' encoding cells for either AM ('Increasing'  $p = 0.21 \chi^2$  test; 'Decreasing'  $p = 0.11 \chi^2$  test) or  
333 BW ('Increasing'  $p = 0.22 \chi^2$  test; 'Decreasing'  $p = 0.52 \chi^2$  test).

334

335 *Vector strength encoding*

336           We found a similar proportion of cells in A1 and ML that significantly phase-locked to AM ( $p =$   
337 0.77,  $\chi^2$  test), as measured by phase-projected vector strength ( $VS_{pp}$ ) (Table 1). As in previous reports

338 (Niwa et al. 2013), we found  $VS_{pp}$  to be weaker in ML than A1 (Figure 2,  $p < 0.05$  at all AM depths,  
339 Wilcoxon rank-sum Test). In both A1 and ML, there was no significant difference in phase-locking ( $VS_{pp}$ )  
340 between the attend AM and attend  $\Delta BW$  conditions ( $p > 0.05$ , signed-rank test, Figure 2).

341

#### 342 *Feature discriminability and context effects*

343 We used the signal detection theory-based area under the receiver operating characteristic  
344 (ROCa) to measure how well an ideal observer could detect the presence of each sound feature based  
345 on the neural responses (either firing rate or  $VS_{pp}$ ). Increases in the levels of both features tended to  
346 yield increasing ROCa (A1 AM Spearman rho = 0.15, BW Spearman rho = .06; ML AM Spearman rho =  
347 0.13, BW Spearman rho = 0.05 ) (Figure 3). However, there was no significant effect of attentional  
348 condition on either feature at any level of feature modulation for either A1 (Figure 3a,c) or ML (Figure  
349 3b,d).

350  $VS_{pp}$ -based discrimination (ROCa) of AM from unmodulated sounds was better at the lowest  
351 modulation depth in A1 than in ML ( $p = 0.02$ , Wilcoxon Rank Sum Test, Figure 4). At the higher  
352 modulation depths,  $VS_{pp}$ -based discrimination was similar in A1 and ML ( $p = 0.99$  AM depth 2;  $p = 0.26$ ,  
353 AM depth 3; Wilcoxon Rank Sum Test; Figure 4). However, there was no significant difference in  $VS_{pp}$   
354 discriminability between attention conditions for any modulation depth ( $p > 0.05$ , signed-rank test,  
355 Figure 4).

356

#### 357 *Choice-related activity*

358 We found a similar proportion of neurons in A1 (19.5%) and ML (26.2%) with significant choice-  
359 related activity during the stimulus window ( $p = 0.31$ ,  $\chi^2$  test). In both areas, the population of neurons  
360 with significant choice-related activity during the response window (from S2 end to joystick movement )



361 was larger than during the stimulus window, and the proportions of neurons were again similar between  
362 the two areas (41.3% A1, 34.4% ML,  $p = 0.41$ ,  $\chi^2$  test).

363 In A1, during the attend AM condition, CP values were evenly distributed about 0.5 during both  
364 the stimulus presentation (S2 median CP = 0.50,  $p = 0.87$  signed-rank test) and the response window  
365 (RW median CP = 0.49,  $p = 0.43$  signed-rank test) (Figure 5a,c). In contrast, during the attend  $\Delta$ BW  
366 context, the CP values tended to be lower than 0.5 during both the stimulus (S2 median CP = 0.49,  $p =$   
367 0.02 signed-rank test) and the response window (RW median CP = 0.46,  $p = 4.2 \text{ e-}8$  signed-rank test)  
368 (Figure 5b,d). That is, during the attend  $\Delta$ BW condition, the population of neurons tended to decrease  
369 firing rate when reporting target feature detection, whereas during the attend AM condition, it was  
370 equally likely for a neuron to increase firing rate for a report of target detection as it was for a report of  
371 target absence. There was a significant difference in the population CP distributions between attention  
372 conditions during the RW (Attend AM median = 0.49, Attend  $\Delta$ BW median = 0.46,  $p = 0.004$ , signed-rank  
373 test), though not during the S2 ( $p = 0.06$ , signed-rank test).

374 The choice-related activity in ML was similar to that reported above in A1 during the S2. During  
375 the attend AM condition, activity was evenly distributed about 0.5 (S2 median CP = 0.50,  $p = 0.94$ ,  
376 signed-rank test) (Figure 6a). During the attend  $\Delta$ BW condition, average CP was less than 0.5 (S2 median  
377 CP = 0.49,  $p = 0.043$  signed-rank test) (Figure 6b). However, during the response window, CP values were  
378 less than 0.5 in both the attend AM condition (median CP = 0.48,  $p = 0.004$  signed-rank test) and the  
379 attend  $\Delta$ BW condition (median CP = 0.47,  $p = 2.7 \text{ e-}5$  signed-rank test) (Figure 6c,d). This is in contrast to  
380 A1 where CP values tended to be lower than 0.5 only in the attend BW condition. There was no  
381 significant difference in the distribution of CP values in ML neurons between the attend AM and attend  
382  $\Delta$ BW conditions during the S2 ( $p = 0.15$ , signed-rank test). However, there was a significant difference in  
383 the CP distribution between the attend AM and attend  $\Delta$ BW conditions in ML during the response  
384 window (Attend AM median = 0.48, Attend  $\Delta$ BW median = 0.47,  $p = 0.033$  signed-rank test), reflecting

385 the population shift to CP values less than 0.5 in the attend  $\Delta$ BW condition compared to the attend AM  
386 condition.

387

### 388 **Discussion**

389 We found a large proportion of cells in ML that decreased firing rate with increasing AM  
390 detectability, similar to previous findings in ML (Johnson et al. 2020; Niwa et al. 2013). However, unlike  
391 these previous studies where ML had a significantly larger population of cells with decreasing AM depth  
392 functions than A1, we found a similar proportion of A1 neurons with decreasing AM depth functions.  
393 Further, the majority of neurons in both A1 and ML significantly encoding AM depth had increasing AM  
394 depth functions. This suggests that the encoding of amplitude modulation can be flexible depending  
395 upon the behavioral and sensory demands of the task. In essence, with increased perceptual difficulty,  
396 stimulus/feature ambiguity, and task difficulty it may be necessary for A1 to develop a more robust and  
397 appropriate code in order to solve the task, and for ML to take on more of the sensory processing, and  
398 thus the encoding schemes look more similar between these two areas.

399 We also found a large population of cells in both A1 and ML that were sensitive to changes in  
400 bandwidth. This was particularly surprising as the changes in bandwidth were relatively small compared  
401 to the 9-octave wide unmodulated noise. It's possible that the  $\Delta$ BW encoding we saw was due to an  
402 increasing concentration of power in the middle frequencies of the broadband noise as the level of  
403 bandwidth restriction increased. It could also be caused by decreasing power in flanking inhibitory  
404 bands. Further studies investigating if and how neurons in A1 and ML encode small changes in spectral  
405 bandwidth to broad-band sounds under power-matched conditions could be enlightening.

406 Using phase-projected vector strength ( $VS_{pp}$ ) as a measure of temporal coding, neither ML nor  
407 A1 single neurons showed attention-related changes in  $VS_{pp}$ -based sensitivity to AM or VS-based choice-  
408 related activity. This is consistent with previous results from our lab showing smaller effects for  $VS_{pp}$ -

409 based attention and choice than for firing rate (Niwa et al. 2013). A recent study that could help  
410 interpretation of this result shows thalamic projections to the striatum (an area involved in decisions  
411 and possibly attention) relay information about temporally modulated sounds in the form of phase-  
412 locking, whereas cortical projections to the striatum only convey information about temporally  
413 modulated sounds with average firing rate over the stimulus (Ponvert and Jaramillo 2019).

414         Attending to the target-feature did not significantly improve single neuron amplitude  
415 modulation or bandwidth restriction detection in A1 or ML. This seems surprising considering the wide  
416 array of effects that have been previously reported in auditory cortex related to different tasks, and  
417 behavioral contexts (Atiani et al. 2014; Bagur et al. 2018; Buran et al. 2014; Francis et al. 2018a; Niwa et  
418 al. 2012b; Otazu et al. 2009; Lakatos et al. 2013; Angeloni and Geffen 2018; Sutter and Shamma 2011).  
419 In macaque monkeys, an improvement in both rate-based and temporal AM encoding was observed in  
420 A1 and ML neurons when animals performed a single-feature AM detection task compared to when  
421 animals passively listened to the same stimuli (Niwa et al. 2013, 2015). We did not see a similar level of  
422 encoding improvement, possibly due to the more fine-tuned form of attention needed to perform this  
423 task.

424         One might expect to observe smaller effects from this more selective form of attention than in a  
425 passive versus active listening task, as the difference between attending to one feature of a sound  
426 compared to another is much smaller than switching between paying attention to a sound and passive  
427 sound presentation. Furthermore, arousal, as measured with pupillometry, has recently been shown to  
428 correlate with increases in activity, gain and trial-to-trial reliability of A1 neurons (Schwartz et al. 2019),  
429 which could account for some of the effects seen in task engagement paradigms.

430         Feature-based attention has been shown to have gain effects on neurons tuned to the attended  
431 feature in visual cortex (Ni and Maunsell 2019; Treue and Trujillo 1999). It is possible that we did not see  
432 a similar gain effect of feature attention in AC due to the mixed-selectivity we and others (Chambers et

433 al. 2014) found in the encoding of these features (i.e. most neurons are sensitive to both AM and  $\Delta BW$ ).  
434 However, it is likely that mixed-selectivity is not the only reason we did not see a gain effect. In a study  
435 where rats performed a frequency categorization task with shifting boundaries, Jaramillo and colleagues  
436 similarly found that neurons in AC did not improve their discriminability with attentional context  
437 (Jaramillo et al. 2014). This similar lack of enhancement seen in a task where only a single feature is  
438 modulated, suggests that the mechanism for feature attention in auditory cortex could be enacted via a  
439 different mechanism.

440 In visual cortical studies probing *selective* feature attention – where the subject must  
441 distinguish between features within a single object, rather than object- or place-oriented, feature-based  
442 attention – results have been similarly complex. At the level of the single neuron, there have not been  
443 clear, gain-like improvements in the sensitivity to the attended feature (Chen et al. 2012; Mirabella et al.  
444 2007; Sasaki and Uka 2009; Uka et al. 2012). Further, the effects of feature-selective attention seem to  
445 be dependent upon not just the tuning preferences of a neuron, but also the strength of its tuning (Ruff  
446 and Born 2015). These studies, along with our own, suggest that segregation of features within an object  
447 may require a different mechanism relative to object-directed, feature-based attention.

448 In each of the feature-selective attention studies cited above, a common observation is that  
449 single neurons in sensory cortex have mixed selectivity for the features in the task, as opposed to being  
450 uniquely responsive to one feature or another. Such mixed selectivity among single neurons may permit  
451 sophisticated, flexible computations at the population level (Fusi et al. 2016). It thus seems likely the  
452 mechanism for feature-selective attention lies not at the level of the single neuron, but rather requires  
453 the integration of activity from a larger population of neurons. A feature-selective study using ERPs  
454 found that the neural responses to identical stimuli varied when the subjects attend to different  
455 features of the stimulus (Nobre et al. 2006). The single neuron and neural circuit mechanisms  
456 underlying this effect remain unclear. One such possible mechanism might be the structure of

457 correlated variability within the population, which has been shown to be modulated by feature-selective  
458 attention (Downer et al. 2017b). Another study, simulating populations by pooling single-neurons  
459 across A1 recordings permitted clear segregation of these two features, as well as an enhancement in  
460 discrimination of the attended feature (Downer et al. 2020). Further studies investigating feature-  
461 selective attention at the level of populations of neurons are necessary to better understand the  
462 underlying mechanisms.

463         We did see an interesting difference in the distribution of choice-related activity between the  
464 attentional conditions, where the correlation between firing rate and choice shifted direction between  
465 conditions. During the attend AM context, CP was evenly distributed about 0.5 with some neurons  
466 showing significant choice activity at either extreme. In contrast, during the attend BW context, CP  
467 values were shifted towards 0, with very few neurons having significant choice-related activity greater  
468 than 0.5 (increasing firing rate for ‘feature-present’ response). Neurons in auditory cortical areas may  
469 also modulate their responses to motor events (Brosch 2005). Some previous reports on choice-related  
470 activity have been difficult to interpret, as they employed a Go/No-Go task format in which one  
471 perceptual choice required a movement and the other choice did not (Brosch 2005; Niwa et al. 2013).  
472 Therefore, the choice-related activity observed was difficult to disentangle from a general preparation  
473 to move. The task reported here was a Yes/No forced-choice task, requiring a motor response to each  
474 decision (target present versus target absent). The shift in choice-related activity between attention  
475 conditions observed in this force choice task, and another recent study (Guo et al. 2019) shows that this  
476 choice-related activity cannot simply reflect motor preparation or action. This then strengthens the  
477 possible relationship between this activity and the decision or attention process.

478         The lack of clear attentional improvement of single neuron feature encoding found in this study  
479 suggests one or more of the following: (1) the feature-selective attention required in this task is not  
480 implemented at the level of an individual neuron in A1 or ML; (2) the feature-selective attention

481 necessary for this particular task occurs at a later stage in auditory processing; (3) the mixed selectivity  
482 of single neurons in A1 and ML for these features complicates the interpretability of the effects of  
483 attention at the single neuron level, in contrast to feature-based attention neurons studied found in  
484 visual cortex (Martinez-Trujillo and Treue 2004; Maunsell 2015; Maunsell and Treue 2006). While we did  
485 not see robust differences in encoding between attentional conditions, the difference in attentional  
486 choice-related activity reveals that it is not simply reflective of motor preparation, and suggests that  
487 activity correlated to reported choice as early as A1 could be informing perceptual and decision  
488 processes.

489

490

491

492

493

494

495

496

497

498

499

500

501

502

503

504

505

|                      | AM Rate<br>Coder | Decreasing<br>AM | Increasing<br>AM<br>+AM coder | Decreasing<br>AM<br>+ AM coder | BW<br>Coder | Decreasing<br>BW | Increasing<br>BW<br>+BW Coder | Decreasing<br>BW<br>+ BW Coder | VS Coder |
|----------------------|------------------|------------------|-------------------------------|--------------------------------|-------------|------------------|-------------------------------|--------------------------------|----------|
| <b>A1</b><br>(n=92)  | 47.8%            | 32.6%            | 41.3%                         | 6.5%                           | 32.6%       | 42.5%            | 18.5%                         | 14.1%                          | 32.6%    |
| <b>ML</b><br>(n=122) | 38.5%            | 27.1%            | 34.4%                         | <b>4.1%</b>                    | 29.5%       | 41.8%            | 20.5%                         | 9.0%                           | 30.33%   |

506

507

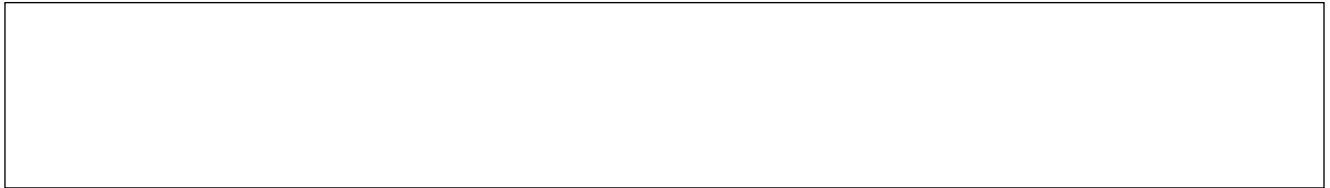

**A.**

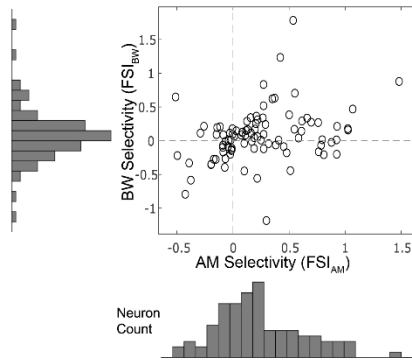

**B.**

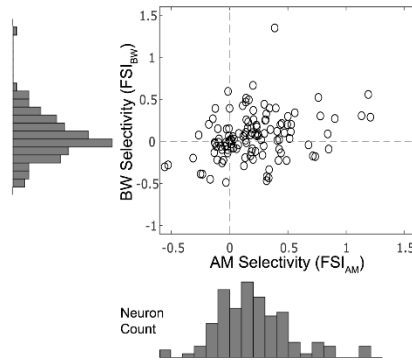

**Figure 1:** Single neuron feature selectivity index (FSI), a measure of how sensitive a neuron is to changes in each feature value separately. **A.** A1: a positive correlation between AM and  $\Delta$ BW selectivity (Pearson rho = 0.3143,  $p = 0.002$ ) **B.** ML: positive correlation between AM and BW selectivity (Pearson's rho = 0.3109,  $p = 5.32 \text{ e-}4$ )

508

509

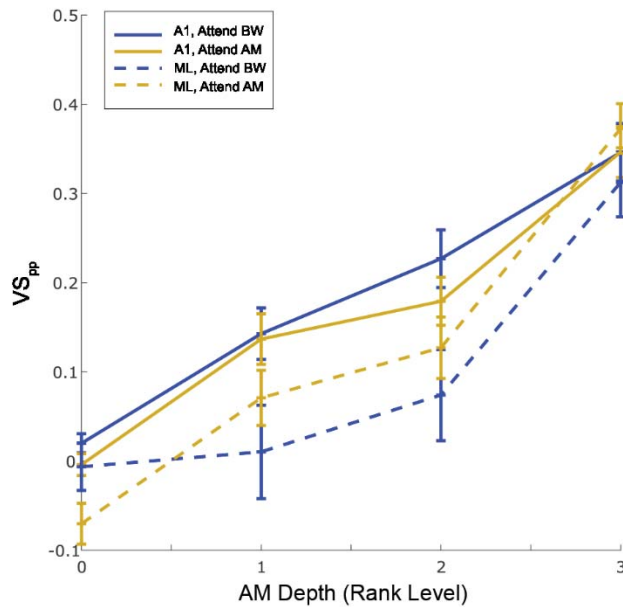

**Figure 2.** Average phase locking ability of single units in A1 (solid lines) and ML (dashed lines), as measured by phase projected vector strength ( $VS_{pp}$ ).  $VS_{pp}$  is greater in A1 (solid) than ML (dashed) at low AM depths (AM level 1,  $p = 0.01$ ; AM level 2,  $p = 0.002$ , Wilcoxon Ranked Sum), though phase locking is more similar at the highest AM depth ( $p = 0.73$ , Wilcoxon ranked sum). There was no significant difference in either area between attend AM (gold) attend  $\Delta$ BW (blue) conditions, ( $p > 0.05$  for all AM levels, Wilcoxon signed rank test).



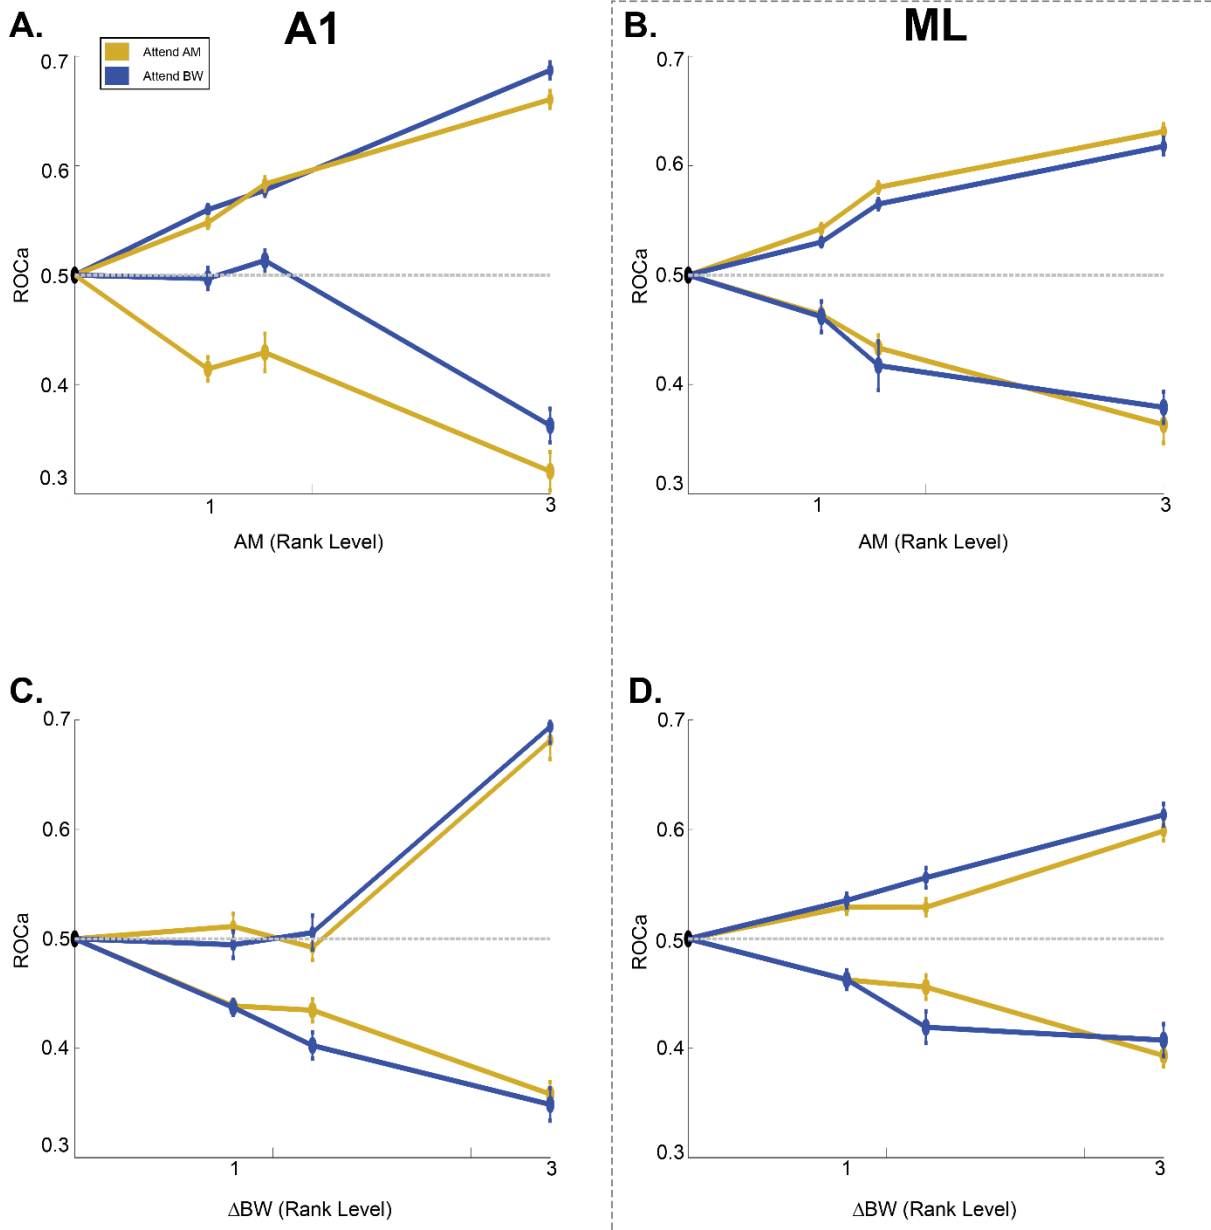

**Figure 3:** Firing rate based ROC<sub>a</sub> for each feature by attention condition. Blue lines indicate attend BW condition, yellow lines indicate attend AM condition. **A.** AM encoding in A1 (38 increasing, 6 decreasing cells). **B.** AM encoding in ML (42 increasing, 5 decreasing cells) **C.** BW encoding in A1 (17 increasing, 13 decreasing cells) **D.** BW encoding in ML (25 increasing, 11 decreasing cells). There was no significant effect of attentional condition on either feature at any level of feature modulation for either A1 (**A,C**) or ML (**B,D**).

510

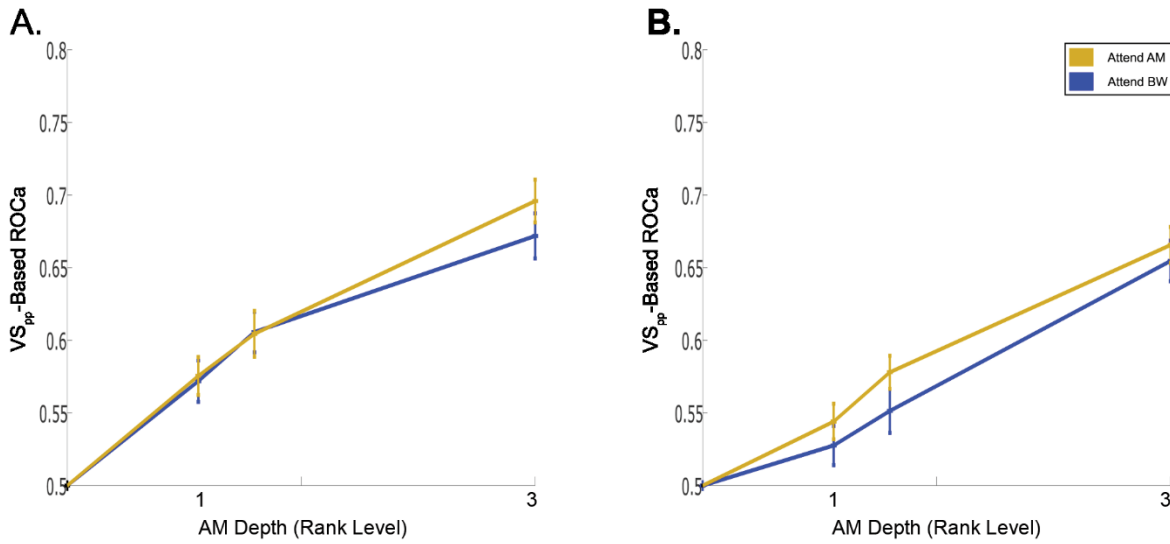

**Figure 4:** VS<sub>pp</sub>-based discriminability (ROCa) of AM from unmodulated sounds in A1 and ML for attend AM (yellow) and attend  $\Delta$ BW (blue) conditions. **A.** In A1, VS<sub>pp</sub>-based discriminability of AM is not significantly different between attention conditions ( $p > 0.05$ , signed-rank test) **B.** In ML, VS<sub>pp</sub>-based ROCa does not differ between attentional conditions ( $p > 0.05$ , signed-rank test). At low modulation depths (AM depth rank = 1), A1 had significantly better AM discriminability than ML ( $p = 0.02$ , rank sum test), however they were not significantly different at the higher modulation depths (AM ranks 2 and 3,  $p > 0.05$ , rank sum test).

511

512

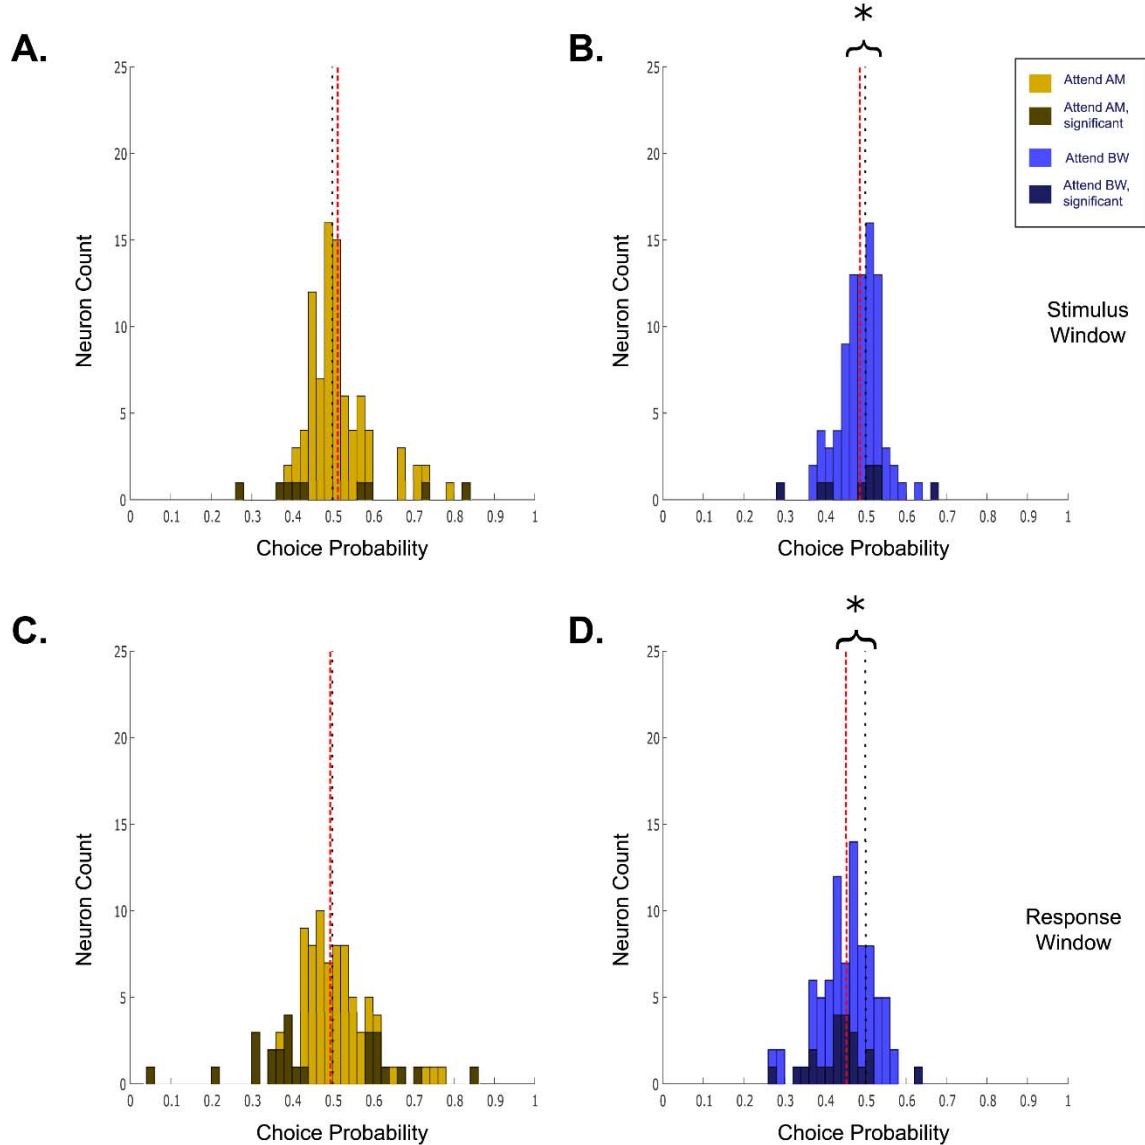

**Figure 5:** Choice probability in A1. Values closer to 0 indicate increased activity for ‘feature-absent’ response, whereas 1 indicates increased activity for ‘feature-present’ response. Darker colored bars indicate cells with significant choice activity. Black dotted line indicates 0.5, red dashed line denotes the population median. CP during the attend AM condition is evenly distributed about 0.5 in both **A.** the stimulus window (median = 0.50,  $p = 0.87$ , signed-rank test) and **C.** the response window (median = 0.49,  $p = 0.43$ , signed-rank test). In the attend  $\Delta$ BW condition, CP values tended to be less than 0.5 in both **B.** the stimulus window (median = 0.49,  $p = 0.02$  signed-rank test) and **D.** the response window (median = 0.46,  $p = 4.2 \text{ e-}8$  signed-rank test). There was a significant difference in the population CP distributions between attention conditions during the RW ( $p = 0.004$ , signed-rank test), though not during the S2 ( $p = 0.06$ , signed-rank test).

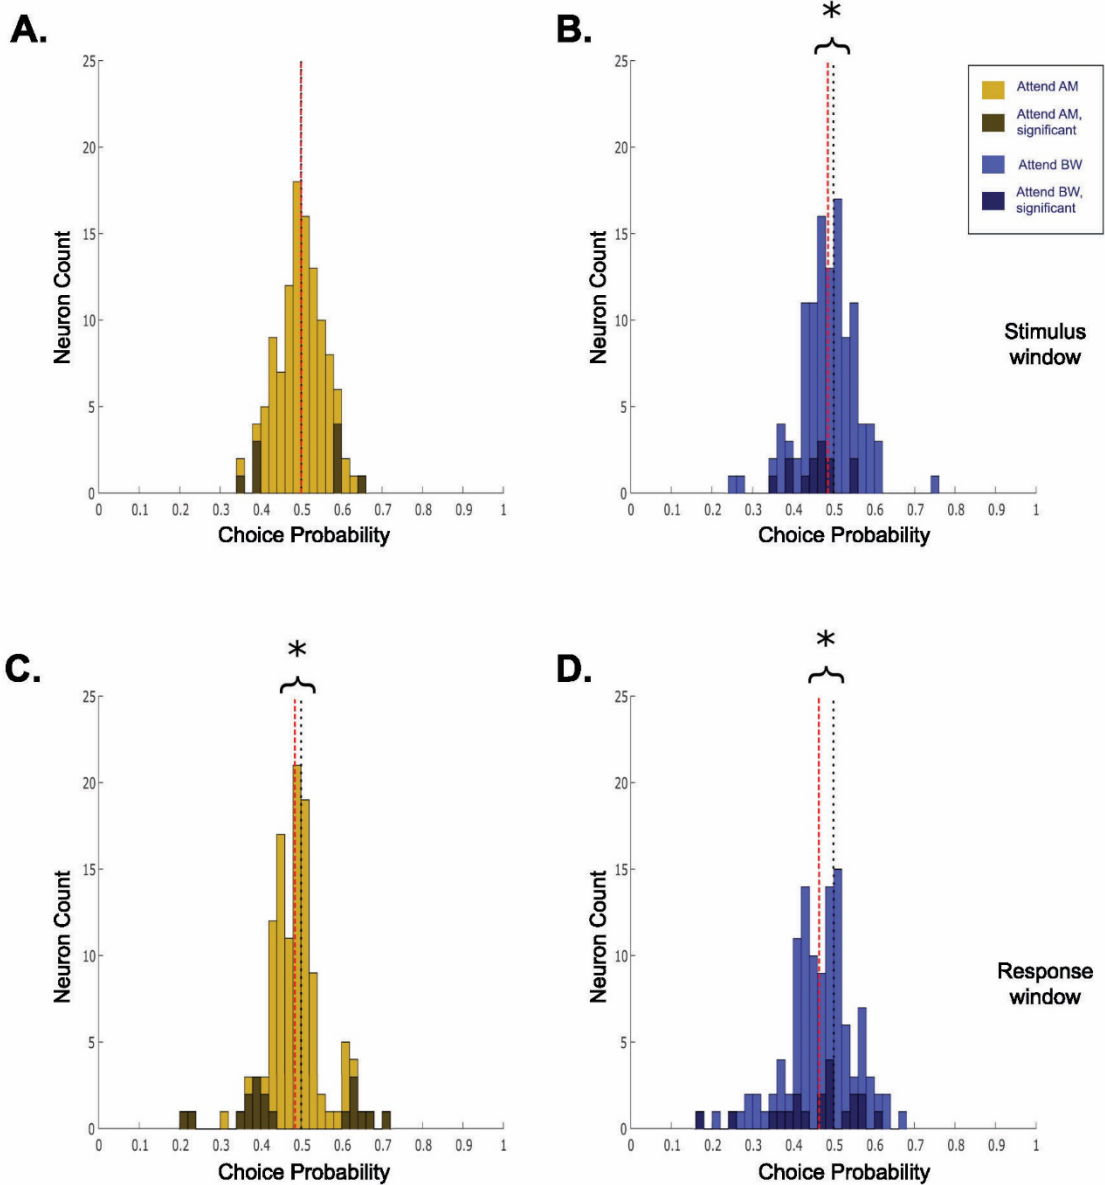

513

514

**Figure 6:** Choice probability in ML, as in Figure 5. CP during the attend AM condition is evenly distributed about 0.5 in **A.** the stimulus window (median = 0.50,  $p = 0.94$ , signed-rank test). However, in the response window **C.** CP values tended to be less than 0.5 (median = 0.48,  $p = 0.004$ , signed-rank test). In the attend  $\Delta$ BW condition, CP values tended to be less than 0.5 in both **B.** the stimulus window (median = 0.49,  $p = 0.043$  signed-rank test) and **D.** the response window (median = 0.47,  $p = 2.7 \times 10^{-5}$  signed-rank test). As in A1, there was a significant difference in the population CP distributions between attention conditions during the RW ( $p = 0.033$ , signed-rank test), though not during the S2 ( $p = 0.15$ , signed-rank test).

515 **References**

- 516 **Angeloni C, Geffen M.** Contextual modulation of sound processing in the auditory cortex. *Current*  
517 *Opinion in Neurobiology* 49: 8–15, 2018.
- 518 **Atiani S, David SV, Elgueta D, Locastro M, Radtke-Schuller S, Shamma SA, Fritz JB.** Emergent Selectivity  
519 for Task-Relevant Stimuli in Higher-Order Auditory Cortex. *Neuron* 82: 486–499, 2014.
- 520 **Bagur S, Averseng M, Elgueta D, David S, Fritz J, Yin P, Shamma S, Boubenec Y, Ostojic S.** Go/No-Go  
521 task engagement enhances population representation of target stimuli in primary auditory cortex. *Nat*  
522 *Commun* 9: 2529, 2018.
- 523 **Bathellier B, Ushakova L, Rumpel S.** Discrete Neocortical Dynamics Predict Behavioral Categorization of  
524 Sounds. *Neuron* 76: 435–449, 2012.
- 525 **Bizley JK, Cohen YE.** The what, where and how of auditory-object perception. *Nature Reviews*  
526 *Neuroscience* 14: 693–707, 2013.
- 527 **Bizley JK, Walker KMM, Nodal FR, King AJ, Schnupp JWH.** Auditory Cortex Represents Both Pitch  
528 Judgments and the Corresponding Acoustic Cues. *Current Biology* 23: 620–625, 2013.
- 529 **Bregman AS.** *Auditory Scene Analysis: The Perceptual Organization of Sound*. MIT Press, 1994.
- 530 **Britten K, Shadlen M, Newsome W, Movshon J.** The analysis of visual motion: a comparison of neuronal  
531 and psychophysical performance. *The Journal of Neuroscience* 12: 4745–4765, 1992.
- 532 **Britten KH, Newsome WT, Shadlen MN, Celebrini S, Movshon JA.** A relationship between behavioral  
533 choice and the visual responses of neurons in macaque MT. *Visual Neuroscience* 13: 87–100, 1996.
- 534 **Brosch M.** Nonauditory Events of a Behavioral Procedure Activate Auditory Cortex of Highly Trained  
535 Monkeys. *Journal of Neuroscience* 25: 6797–6806, 2005.
- 536 **Buran BN, von Trapp G, Sanes DH.** Behaviorally Gated Reduction of Spontaneous Discharge Can  
537 Improve Detection Thresholds in Auditory Cortex. *Journal of Neuroscience* 34: 4076–4081, 2014.
- 538 **Carcea I, Insanally MN, Froemke RC.** Dynamics of auditory cortical activity during behavioural  
539 engagement and auditory perception. *Nat Commun* 8: 14412, 2017.
- 540 **Chambers AR, Hancock KE, Sen K, Polley DB.** Online Stimulus Optimization Rapidly Reveals  
541 Multidimensional Selectivity in Auditory Cortical Neurons. *Journal of Neuroscience* 34: 8963–8975, 2014.
- 542 **Chen X, Hoffmann K-P, Albright TD, Thiele A.** Effect of feature-selective attention on neuronal  
543 responses in macaque area MT. *Journal of Neurophysiology* 107: 1530–1543, 2012.
- 544 **Christison-Lagay KL, Bennur S, Cohen YE.** Contribution of spiking activity in the primary auditory cortex  
545 to detection in noise. *Journal of Neurophysiology* 118: 3118–3131, 2017.
- 546 **Christison-Lagay KL, Cohen YE.** The Contribution of Primary Auditory Cortex to Auditory Categorization  
547 in Behaving Monkeys. *Front Neurosci* 12: 601, 2018.

- 548 **Downer JD, Niwa M, Sutter ML.** Task Engagement Selectively Modulates Neural Correlations in Primary  
549 Auditory Cortex. *Journal of Neuroscience* 35: 7565–7574, 2015.
- 550 **Downer JD, Niwa M, Sutter ML.** Hierarchical differences in population coding within auditory cortex.  
551 *Journal of Neurophysiology* 118: 717–731, 2017a.
- 552 **Downer JD, Rapone B, Verhein J, O'Connor KN, Sutter ML.** Feature-Selective Attention Adaptively Shifts  
553 Noise Correlations in Primary Auditory Cortex. *The Journal of Neuroscience* 37: 5378–5392, 2017b.
- 554 **Downer JD, Verhein JR, Rapone BC, O'Connor KN, Sutter ML.** An emergent population code in primary  
555 auditory cortex supports selective attention to spectral and temporal sound features. *bioRxiv*  
556 2020.03.09.984773, 2020.
- 557 **Elgueda D, Duque D, Radtke-Schuller S, Yin P, David SV, Shamma SA, Fritz JB.** State-dependent  
558 encoding of sound and behavioral meaning in a tertiary region of the ferret auditory cortex. *Nat*  
559 *Neurosci* 22: 447–459, 2019.
- 560 **Eliades SJ, Wang X.** Sensory-Motor Interaction in the Primate Auditory Cortex During Self-Initiated  
561 Vocalizations. *Journal of Neurophysiology* 89: 2194–2207, 2003.
- 562 **Engle JR, Recanzone GH.** Characterizing spatial tuning functions of neurons in the auditory cortex of  
563 young and aged monkeys: a new perspective on old data. *Frontiers in Aging Neuroscience* 4: 36, 2013.
- 564 **Francis NA, Elgueda D, Englitz B, Fritz JB, Shamma SA.** Laminar profile of task-related plasticity in ferret  
565 primary auditory cortex. *Sci Rep* 8: 16375, 2018a.
- 566 **Francis NA, Winkowski DE, Sheikhattar A, Armengol K, Babadi B, Kanold PO.** Small Networks Encode  
567 Decision-Making in Primary Auditory Cortex. *Neuron* 97: 885–897.e6, 2018b.
- 568 **Fritz J, Shamma S, Elhilali M, Klein D.** Rapid task-related plasticity of spectrotemporal receptive fields in  
569 primary auditory cortex. *Nat Neurosci* 6: 1216–1223, 2003.
- 570 **Fritz JB.** Differential Dynamic Plasticity of A1 Receptive Fields during Multiple Spectral Tasks. *Journal of*  
571 *Neuroscience* 25: 7623–7635, 2005.
- 572 **Fritz JB, Elhilali M, Shamma SA.** Adaptive Changes in Cortical Receptive Fields Induced by Attention to  
573 Complex Sounds. *Journal of Neurophysiology* 98: 2337–2346, 2007.
- 574 **Fusi S, Miller EK, Rigotti M.** Why neurons mix: high dimensionality for higher cognition. *Current Opinion*  
575 *in Neurobiology* 37: 66–74, 2016.
- 576 **Goldberg JM, Brown PB.** Response of binaural neurons of dog superior olivary complex to dichotic tonal  
577 stimuli: some physiological mechanisms of sound localization. *Journal of Neurophysiology* 32: 613–636,  
578 1969.
- 579 **Green DM, Swets JA.** *Signal detection theory and psychophysics*. Huntington, NY: Krieger Publishing  
580 Company, 1974.

- 581 **Grimault N, Bacon SP, Michey C.** Auditory stream segregation on the basis of amplitude-modulation  
582 rate. *The Journal of the Acoustical Society of America* 111: 1340–1348, 2002.
- 583 **Gronskaya E, von der Behrens W.** Evoked Response Strength in Primary Auditory Cortex Predicts  
584 Performance in a Spectro-Spatial Discrimination Task in Rats. *J Neurosci* 39: 6108–6121, 2019.
- 585 **Guo L, Weems JT, Walker WI, Levichev A, Jaramillo S.** Choice-Selective Neurons in the Auditory Cortex  
586 and in Its Striatal Target Encode Reward Expectation. *J Neurosci* 39: 3687–3697, 2019.
- 587 **Hackett TA.** Information flow in the auditory cortical network. *Hearing Research* 271: 133–146, 2011.
- 588 **Huang Y, Brosch M.** Associations between sounds and actions in primate prefrontal cortex. *Brain*  
589 *Research* 1738: 146775, 2020.
- 590 **Huang Y, Heil P, Brosch M.** Associations between sounds and actions in early auditory cortex of  
591 nonhuman primates. *eLife* 8: e43281, 2019.
- 592 **Jaramillo S, Borges K, Zador AM.** Auditory Thalamus and Auditory Cortex Are Equally Modulated by  
593 Context during Flexible Categorization of Sounds. *Journal of Neuroscience* 34: 5291–5301, 2014.
- 594 **Johnson JS, Niwa M, O'Connor KN, Sutter ML.** Amplitude modulation encoding in auditory cortex:  
595 Comparisons between the primary and middle lateral belt regions. *bioRxiv*, 2020.  
596 doi:10.1101/2020.03.05.979575.
- 597 **Kang I, Maunsell JHR.** Potential confounds in estimating trial-to-trial correlations between neuronal  
598 response and behavior using choice probabilities. *Journal of Neurophysiology* 108: 3403–3415, 2012.
- 599 **Lakatos P, Musacchia G, O'Connell MN, Falchier AY, Javitt DC, Schroeder CE.** The Spectrotemporal Filter  
600 Mechanism of Auditory Selective Attention. *Neuron* 77: 750–761, 2013.
- 601 **Lee C-C, Middlebrooks JC.** Auditory cortex spatial sensitivity sharpens during task performance. *Nature*  
602 *Neuroscience* 14: 108–114, 2011.
- 603 **Lin P-A, Asinof SK, Edwards NJ, Isaacson JS.** Arousal regulates frequency tuning in primary auditory  
604 cortex. *Proc Natl Acad Sci USA* 116: 25304–25310, 2019.
- 605 **Mardia KV, Jupp PE.** *Directional statistics*. Chichester; New York: J. Wiley, 2000.
- 606 **Martinez-Trujillo JC, Treue S.** Feature-Based Attention Increases the Selectivity of Population Responses  
607 in Primate Visual Cortex. *Current Biology* 14: 744–751, 2004.
- 608 **Massoudi R, Van Wanrooij MM, Van Wetter SMCI, Versnel H, Van Opstal AJ.** Task-related preparatory  
609 modulations multiply with acoustic processing in monkey auditory cortex. *Eur J Neurosci* 39: 1538–1550,  
610 2014.
- 611 **Maunsell JHR.** Neuronal Mechanisms of Visual Attention. *Annual Review of Vision Science* 1: 373–391,  
612 2015.

- 613 **Maunsell JHR, Treue S.** Feature-based attention in visual cortex. *Trends in Neurosciences* 29: 317–322,  
614 2006.
- 615 **McDermott JH.** The cocktail party problem. *Curr Biol* 19: R1024-1027, 2009.
- 616 **Merzenich MM, Brugge JF.** Representation of the cochlear partition on the superior temporal plane of  
617 the macaque monkey. *Brain Research* 50: 275–296, 1973.
- 618 **Mirabella G, Bertini G, Samengo I, Kilavik BE, Frilli D, Della Libera C, Chelazzi L.** Neurons in Area V4 of  
619 the Macaque Translate Attended Visual Features into Behaviorally Relevant Categories. *Neuron* 54: 303–  
620 318, 2007.
- 621 **Ni AM, Maunsell JHR.** Neuronal Effects of Spatial and Feature Attention Differ Due to Normalization. *J*  
622 *Neurosci* 39: 5493–5505, 2019.
- 623 **Niwa M, Johnson JS, O'Connor KN, Sutter ML.** Active Engagement Improves Primary Auditory Cortical  
624 Neurons' Ability to Discriminate Temporal Modulation. *Journal of Neuroscience* 32: 9323–9334, 2012a.
- 625 **Niwa M, Johnson JS, O'Connor KN, Sutter ML.** Activity Related to Perceptual Judgment and Action in  
626 Primary Auditory Cortex. *Journal of Neuroscience* 32: 3193–3210, 2012b.
- 627 **Niwa M, Johnson JS, O'Connor KN, Sutter ML.** Differences between Primary Auditory Cortex and  
628 Auditory Belt Related to Encoding and Choice for AM Sounds. *Journal of Neuroscience* 33: 8378–8395,  
629 2013.
- 630 **Niwa M, O'Connor KN, Engall E, Johnson JS, Sutter ML.** Hierarchical effects of task engagement on  
631 amplitude modulation encoding in auditory cortex. *Journal of Neurophysiology* 113: 307–327, 2015.
- 632 **Nobre AC, Rao A, Chelazzi L.** Selective Attention to Specific Features within Objects: Behavioral and  
633 Electrophysiological Evidence. *Journal of Cognitive Neuroscience* 18: 539–561, 2006.
- 634 **O'Connor KN, Petkov CI, Sutter ML.** Adaptive Stimulus Optimization for Auditory Cortical Neurons.  
635 *Journal of Neurophysiology* 94: 4051–4067, 2005.
- 636 **Osmanski MS, Wang X.** Behavioral Dependence of Auditory Cortical Responses. *Brain Topogr* 28: 365–  
637 378, 2015.
- 638 **Otazu GH, Tai L-H, Yang Y, Zador AM.** Engaging in an auditory task suppresses responses in auditory  
639 cortex. *Nature Neuroscience* 12: 646–654, 2009.
- 640 **Ponvert ND, Jaramillo S.** Auditory Thalamostriatal and Corticostriatal Pathways Convey Complementary  
641 Information about Sound Features. *J Neurosci* 39: 271–280, 2019.
- 642 **Rauschecker JP, Tian B.** Mechanisms and streams for processing of “what” and “where” in auditory  
643 cortex. *Proceedings of the National Academy of Sciences* 97: 11800–11806, 2000.
- 644 **Romanski LM, Tian B, Fritz J, Mishkin M, Goldman-Rakic PS, Rauschecker JP.** Dual streams of auditory  
645 afferents target multiple domains in the primate prefrontal cortex. *Nature Neuroscience* 2: 1131–1136,  
646 1999.



- 647 **Ruff DA, Born RT.** Feature attention for binocular disparity in primate area MT depends on tuning  
648 strength. *Journal of Neurophysiology* 113: 1545–1555, 2015.
- 649 **Runyan CA, Piasini E, Panzeri S, Harvey CD.** Distinct timescales of population coding across cortex.  
650 *Nature* 548: 92–96, 2017.
- 651 **Saleem K, Logothetis Nikos K.** *A combined MRI and histology atlas of the rhesus monkey brain in  
652 stereotaxic coordinates.* Burlington, MA: Academic Press, 2007.
- 653 **Sasaki R, Uka T.** Dynamic Readout of Behaviorally Relevant Signals from Area MT during Task Switching.  
654 *Neuron* 62: 147–157, 2009.
- 655 **Schneider DM, Nelson A, Mooney R.** A synaptic and circuit basis for corollary discharge in the auditory  
656 cortex. *Nature* 513: 189–194, 2014.
- 657 **Schnupp JWH.** Plasticity of Temporal Pattern Codes for Vocalization Stimuli in Primary Auditory Cortex.  
658 *Journal of Neuroscience* 26: 4785–4795, 2006.
- 659 **Schwartz ZP, Buran BN, David SV.** Pupil-associated states modulate excitability but not stimulus  
660 selectivity in primary auditory cortex. *Journal of Neurophysiology* 191–208, 2019.
- 661 **Schwartz ZP, David SV.** Focal Suppression of Distractor Sounds by Selective Attention in Auditory Cortex.  
662 *Cerebral Cortex* 28: 323–339, 2018.
- 663 **Scott BH, Malone BJ, Semple MN.** Effect of Behavioral Context on Representation of a Spatial Cue in  
664 Core Auditory Cortex of Awake Macaques. *Journal of Neuroscience* 27: 6489–6499, 2007.
- 665 **Shannon RV, Zeng F-G, Kamath V, Wygonski J, Ekelid M.** Speech Recognition with Primarily Temporal  
666 Cues. *Science* 270: 303–304, 1995.
- 667 **Shinn-Cunningham BG.** Object-based auditory and visual attention. *Trends in Cognitive Sciences* 12:  
668 182–186, 2008.
- 669 **Strickland EA, Viemeister NF.** The effects of frequency region and bandwidth on the temporal  
670 modulation transfer function. *The Journal of the Acoustical Society of America* 102: 1799–1810, 1997.
- 671 **Sutter ML, Shamma SA.** The Relationship of Auditory Cortical Activity to Perception and Behavior. In:  
672 *The Auditory Cortex*, edited by Winer JA, Schreiner CE. Springer US, p. 617–641.
- 673 **Tian B, Rauschecker JP.** Processing of Frequency-Modulated Sounds in the Lateral Auditory Belt Cortex  
674 of the Rhesus Monkey. *Journal of Neurophysiology* 92: 2993–3013, 2004.
- 675 **von Trapp G, Buran BN, Sen K, Semple MN, Sanes DH.** A Decline in Response Variability Improves  
676 Neural Signal Detection during Auditory Task Performance. *Journal of Neuroscience* 36: 11097–11106,  
677 2016.
- 678 **Treue S, Trujillo JCM.** Feature-based attention influences motion processing gain in macaque visual  
679 cortex. *Nature* 399: 575–579, 1999.

- 680 **Tsunada J, Cohen YE.** Neural mechanisms of auditory categorization: from across brain areas to within  
681 local microcircuits. *Frontiers in Neuroscience* 8: 161, 2014.
- 682 **Tsunada J, Liu ASK, Gold JI, Cohen YE.** Causal contribution of primate auditory cortex to auditory  
683 perceptual decision-making. *Nature Neuroscience* 19: 135–142, 2016.
- 684 **Uka T, Sasaki R, Kumano H.** Change in Choice-Related Response Modulation in Area MT during Learning  
685 of a Depth-Discrimination Task is Consistent with Task Learning. *Journal of Neuroscience* 32: 13689–  
686 13700, 2012.
- 687 **Van Tasell DJ, Soli SD, Kirby VM, Widin GP.** Speech waveform envelope cues for consonant recognition.  
688 *The Journal of the Acoustical Society of America* 82: 1152–1161, 1987.
- 689 **Wang L, Narayan R, Grana G, Shamir M, Sen K.** Cortical Discrimination of Complex Natural Stimuli: Can  
690 Single Neurons Match Behavior? *Journal of Neuroscience* 27: 582–589, 2007.
- 691 **Woods KJP, McDermott JH.** Attentive Tracking of Sound Sources. *Current Biology* 25: 2238–2246, 2015.
- 692 **Yin P, Fritz JB, Shamma SA.** Rapid Spectrotemporal Plasticity in Primary Auditory Cortex during Behavior.  
693 *Journal of Neuroscience* 34: 4396–4408, 2014.
- 694 **Yin P, Johnson JS, O'Connor KN, Sutter ML.** Coding of Amplitude Modulation in Primary Auditory Cortex.  
695 *Journal of Neurophysiology* 105: 582–600, 2011.
- 696
